# Supplementary material for: Lipophilic Fe(III)-Complex with Potent Broad-Spectrum Anticancer Activity and Ability to Overcome Pt Resistance in A2780cis Cancer Cells
Source: MDPI journal article supplement (doi:10.3390/molecules28134917), 2023-06-22
Supplement: s1 [file s1]

# **Lipophilic Fe(III)-Complex with Potent Broad-spectrum Anticancer Activity and Ability to Overcome Pt Resistance in A2780cis Cancer Cells**

Nalin Abeydeera<sup>1</sup>, Morgan Stilgenbauer<sup>1</sup>, Bishnu D. Pant<sup>1</sup>, Khalil Mudarmah<sup>1, 2</sup>, Thiloka M. Dassanayake<sup>1</sup>, Yao-Rong Zheng<sup>1\*</sup> and Songping D. Huang<sup>1\*</sup>

<sup>1</sup>Department of Chemistry and Biochemistry, Kent State University, Kent, OH 44240, USA.

<sup>2</sup>Department of Chemistry, Jazan University, Jazan, 45142, Saudi Arabia.

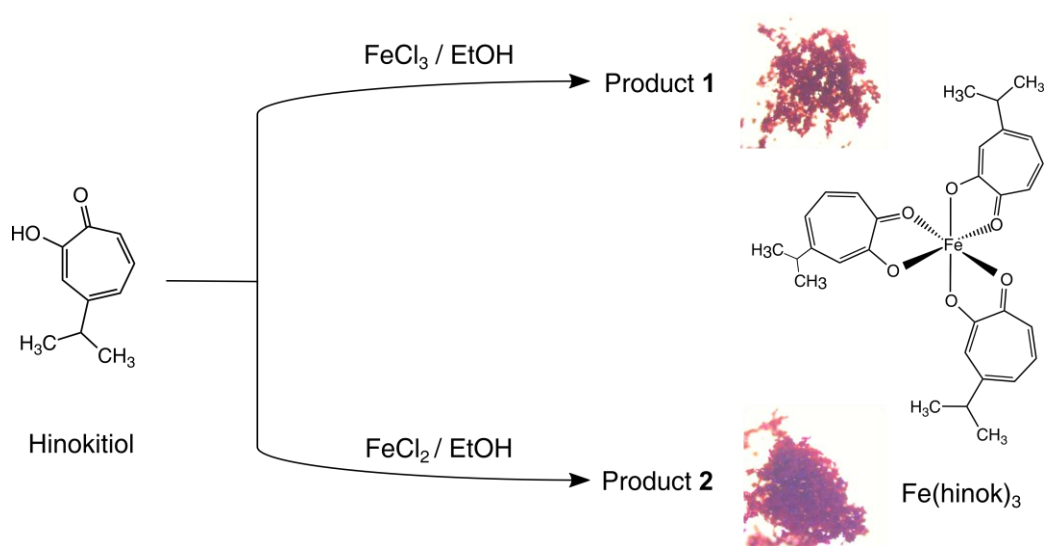

**Scheme S1.** Formation of  $\text{Fe}(\text{hinok})_3$  in ethanol from the complexation of Fe(III) or Fe(II) by hinokitiol.

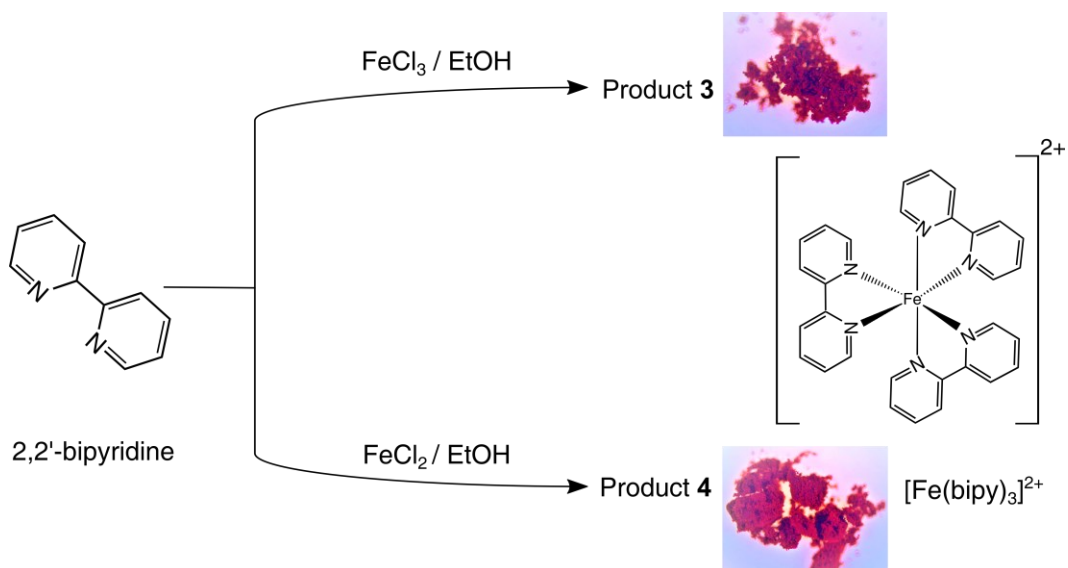

**Scheme S2.** Formation of  $[\text{Fe}(\text{bipy})_3]^{2+}$  in ethanol from the complexation of Fe(III) or Fe(II) by 2,2'-bipyridine.

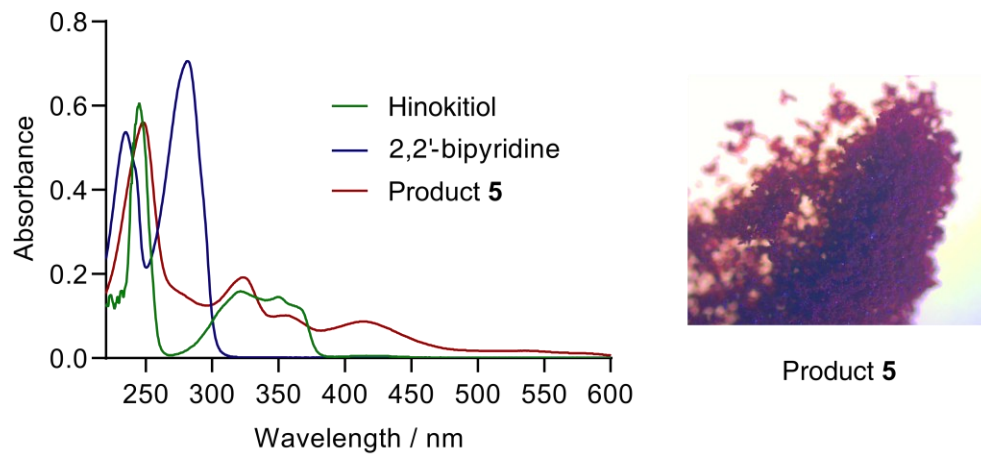

Reaction:

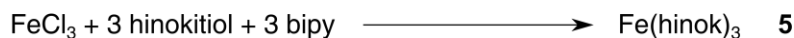

**Figure S1.** UV-Vis spectra of complex formed from the reaction of  $\text{FeCl}_3$  in the presence of hinokitiol (3 molar equivalents) and 2,2'-bipyridine; bipy (3 molar equivalents) in ethanol, confirming that the only complex formed is  $\text{Fe(hinok)}_3$  (left) and a selective photographic image of the isolated product (product **5**) from the reaction (right).

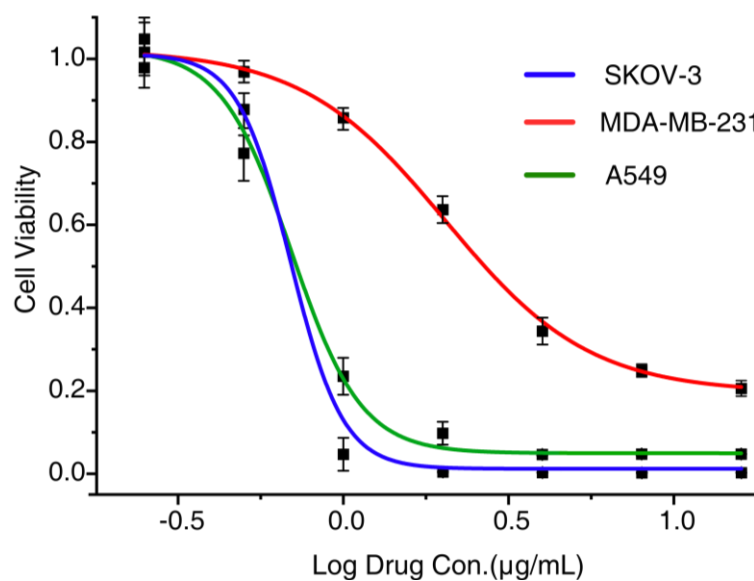

**Figure S2.** Representative killing curves of SKOV-3 (ovarian cancer cells;  $\text{IC}_{50}=1.23\pm0.01$   $\mu\text{M}$  or  $0.67$   $\mu\text{g/mL}$ ), MDA-MB-231 (breast cancer cells;  $\text{IC}_{50}=3.83\pm0.12$   $\mu\text{M}$  or  $2.0$   $\mu\text{g/mL}$ ) and A549 (lung cancer cells;  $\text{IC}_{50}=1.50\pm0.32$   $\mu\text{M}$  or  $0.82$   $\mu\text{g/mL}$ ).

**Table S1.** Elemental analysis results of Fe(hinok)<sub>3</sub>.

| Elements     | C <sub>30</sub> H <sub>33</sub> O <sub>6</sub> Fe |                |
|--------------|---------------------------------------------------|----------------|
|              | Calculated %                                      | Experimental % |
| Carbon (C)   | 66.06                                             | 65.84          |
| Hydrogen (H) | 6.10                                              | 5.96           |
| Iron (Fe)    | 10.24                                             | 10.14          |
